# Supplementary material
Source: publisher figshare collection journal article supplement (https://gsapubs.figshare.com/ndownloader/files/22743635)
Supplement: Supplementary file 1 [file 22743635]

## Data Repository Item 2002053 – Sampling technique and statistical analysis descriptions

### Sampling technique description

Data collection involved four steps: **1) Sample collection:** From each outcrop, samples (~3-5 kg each) were collected at set intervals along a measuring tape oriented at a high angle to lithologic layering or foliation (see Figure DR1). Veins are commonly surrounded by a zone of altered rock, so larger samples (up to 16 kg) were taken from highly veined outcrops to include vein, altered selvage, and host rock. The average outcrop traverse was ~50 m long and consisted of 26 samples. The Macraes Flat Au-W deposit (see Table DR1) had to be sampled differently; here, 16 specimens were randomly selected from the mine dumps. **2) Sample preparation:** Fresh samples were cut into rectangular slabs of representative elemental volume (oriented orthogonal to any fabric—see Figure DR1), abraded with SiC paper, ultrasonically cleaned in distilled, deionized water, and pulverized in agate mills. **(3) Compositing:** Two grams of each pulverized sample from an outcrop were combined and thoroughly mixed in a modified ball mill to create an outcrop composite. Grain densities are relatively constant (range = 2.72–2.82 g/cm<sup>3</sup> – see Table DR1) for both low- and high-grade TZ metasediments; thus mass composites are equivalent to volume composites (grain density = rock density on a porosity free basis). **4) Analysis:** The chemical composition of each composite was analyzed using X-Ray Fluorescence and ICP-MS (see Table DR1). All samples from one representative outcrop traverse were analyzed and averaged to evaluate the effectiveness of our compositing technique (see Figure DR2). The individual sample averages are not significantly different from our composite analysis for the outcrop.

### Univariant statistical analysis

Univariant comparisons of compositional ratios first involved an F-test to determine if the distributions had significantly different variances. If not, then the standard Student's t-test was used, otherwise, a t-test for distributions with unequal variances was used. Computer subroutines used for these tests and for the Two-Dimensional Kolmogorov-Smirnov (K-S) tests are from Press, W.H., Teukolsky, S.A., Vetterling, W.T., and Flannery, B.P., 1992, Numerical recipes in Fortran 77: The art of scientific computing, 2<sup>nd</sup> edition: New York, Cambridge, 963 p. Logratio averaging methods (Ague, J.J., and van Haren, J.L.M., 1996, Assessing metasomatic mass and volume changes using the bootstrap, with application to deep crustal hydrothermal alteration of marble: Economic Geology, v. 91, p. 1169-1182.) were calculated for all statistical analysis and yielded nearly identical results.

## Data Repository Item -- Table DR1

Table DR1. XRF analyses were performed by X-Ray Assay Laboratories (XRAL) in Don Mills, Ontario. Major elements (A) were determined on glass beads and trace elements (B) on pressed pellets (Rb, Sr, Zr, Ba) and by ICPMS (W\*). Total Fe is reported as Fe<sub>2</sub>O<sub>3</sub>. Detection limits were 0.01 wt% for major elements (0.001 for TiO<sub>2</sub>) and 2 ppm for pressed pellet trace elements (20 for Ba). ICPMS analysis detection limits were 0.05 ppm (W\*). W\* concentrations are aqua regia leach fractions. These fractions are considered proxies for the most easily mobilized W (from Fe- and Fe-Ti oxides, common sulfides, and grain boundaries) and represent the W that is most likely involved in ore metal transport and deposition by common metamorphic fluids.

## A

| Composite outcrop sample   | Locality               | NZ grid reference | Traverse length (m) | Number of samples | SiO <sub>2</sub> (wt%) | Al <sub>2</sub> O <sub>3</sub> (wt%) | CaO (wt%) | MgO (wt%) | Na <sub>2</sub> O (wt%) | K <sub>2</sub> O (wt%) | Fe <sub>2</sub> O <sub>3</sub> (wt%) | MnO (wt%) | TiO <sub>2</sub> (wt%) | P <sub>2</sub> O <sub>5</sub> (wt%) | LOI (wt%) | Sum   |
|----------------------------|------------------------|-------------------|---------------------|-------------------|------------------------|--------------------------------------|-----------|-----------|-------------------------|------------------------|--------------------------------------|-----------|------------------------|-------------------------------------|-----------|-------|
| JANZ- 5                    | N. of Omarama          | H39 699340        | 80                  | 41                | 63.3                   | 16.2                                 | 2.78      | 2.16      | 3.25                    | 2.05                   | 5.71                                 | 0.09      | 0.725                  | 0.17                                | 3.40      | 99.9  |
| JANZ- 8                    | Lindis Pass Rd         | G40 335023        | 50                  | 26                | 66.0                   | 15.3                                 | 2.42      | 1.60      | 3.39                    | 2.70                   | 4.20                                 | 0.06      | 0.622                  | 0.16                                | 2.15      | 98.7  |
| JANZ- 9                    | Lindis Pass Rd         | G40 315068        | 6                   | 13                | 67.0                   | 15.4                                 | 2.30      | 1.44      | 3.78                    | 2.87                   | 4.12                                 | 0.07      | 0.565                  | 0.13                                | 2.10      | 100.0 |
| JANZ-10                    | Lindis Pass Rd         | G40 316067        | 50                  | 26                | 66.9                   | 15.0                                 | 2.13      | 1.58      | 3.85                    | 2.67                   | 4.15                                 | 0.07      | 0.588                  | 0.11                                | 1.90      | 99.2  |
| JANZ-12                    | W. of Queenstown       | E41 650637        | 46                  | 25                | 63.8                   | 15.1                                 | 3.93      | 2.07      | 3.57                    | 1.78                   | 5.53                                 | 0.09      | 0.664                  | 0.17                                | 2.35      | 99.2  |
| JANZ-13                    | Falls Dam              | H41 653881        | 50                  | 26                | 64.3                   | 16.1                                 | 2.40      | 1.97      | 3.44                    | 2.90                   | 4.75                                 | 0.07      | 0.643                  | 0.17                                | 2.20      | 99.2  |
| JANZ-14                    | Fruitlands-Roxburgh Rd | G43 190301        | 7.5                 | 18                | 60.1                   | 16.2                                 | 5.06      | 2.69      | 3.67                    | 1.83                   | 6.46                                 | 0.10      | 0.807                  | 0.18                                | 1.90      | 99.2  |
| JANZ-15                    | Beaumont               | G44 400820        | 33                  | 33                | 70.5                   | 13.4                                 | 2.13      | 1.11      | 4.31                    | 2.21                   | 3.15                                 | 0.06      | 0.475                  | 0.09                                | 1.65      | 99.2  |
| JANZ-18                    | S. of Middlemarch      | H43 840096        | 14                  | 28                | 68.1                   | 14.4                                 | 1.96      | 1.31      | 3.77                    | 2.23                   | 3.68                                 | 0.06      | 0.514                  | 0.12                                | 2.25      | 98.6  |
| JANZ-20                    | Beaumont-Rongahere Rd  | G44 373719        | 18                  | 19                | 66.3                   | 15.8                                 | 1.62      | 1.42      | 3.52                    | 3.39                   | 4.07                                 | 0.06      | 0.628                  | 0.15                                | 2.20      | 99.4  |
| JANZ-24                    | Menzies Rd             | J39 280295        | 50                  | 27                | 65.3                   | 15.7                                 | 2.75      | 1.89      | 3.44                    | 2.55                   | 4.62                                 | 0.08      | 0.640                  | 0.17                                | 2.70      | 100.0 |
| JANZ-25                    | Myers Pass Rd          | J39 323104        | 39                  | 41                | 66.0                   | 15.8                                 | 2.33      | 1.50      | 3.83                    | 3.05                   | 3.82                                 | 0.07      | 0.597                  | 0.16                                | 1.90      | 99.3  |
| JANZ-26                    | Dansey Pass Rd         | I41 182821        | 18                  | 38                | 65.0                   | 15.6                                 | 2.45      | 1.99      | 3.29                    | 2.47                   | 4.87                                 | 0.07      | 0.633                  | 0.15                                | 2.90      | 99.6  |
| JANZ-27                    | Macraes Flat           | I42 105336        | N/A <sup>1</sup>    | 16                | 64.1                   | 15.3                                 | 1.97      | 2.30      | 3.28                    | 2.32                   | 5.81                                 | 0.08      | 0.753                  | 0.18                                | 3.20      | 99.4  |
| JANZ-28                    | Benmore Dam Rd         | H39 867235        | 60                  | 31                | 62.4                   | 16.6                                 | 2.41      | 1.93      | 2.97                    | 2.72                   | 6.11                                 | 0.08      | 0.758                  | 0.16                                | 3.00      | 99.2  |
| JANZ-32                    | Cromwell Gorge         | G41 118657        | 100                 | 52                | 68.2                   | 14.2                                 | 2.58      | 1.51      | 3.62                    | 2.48                   | 3.74                                 | 0.05      | 0.517                  | 0.13                                | 2.20      | 99.4  |
| JANZ-33                    | Harwea neck            | F39 073337        | 50                  | 26                | 67.2                   | 15.2                                 | 2.49      | 1.53      | 3.57                    | 2.33                   | 4.34                                 | 0.07      | 0.574                  | 0.12                                | 2.25      | 99.8  |
| JANZ-35                    | W. of Wanaka           | F40 913095        | 50                  | 26                | 63.9                   | 15.3                                 | 2.13      | 1.75      | 3.12                    | 2.16                   | 5.35                                 | 0.11      | 0.670                  | 0.15                                | 4.60      | 99.4  |
| JANZ-36                    | East side Lake Wanaka  | F39 063395        | 50                  | 26                | 65.2                   | 14.7                                 | 3.58      | 2.33      | 3.88                    | 1.76                   | 5.59                                 | 0.10      | 0.691                  | 0.17                                | 1.70      | 99.8  |
| JANZ-70                    | W. of Lake Ohau        | H38 528595        | 47                  | 48                | 65.6                   | 15.8                                 | 2.50      | 1.74      | 3.32                    | 2.86                   | 4.38                                 | 0.07      | 0.596                  | 0.17                                | 2.65      | 99.8  |
| JANZ-71                    | Twizel-Omarama Rd      | H38 759517        | 50                  | 26                | 64.4                   | 15.5                                 | 2.99      | 2.22      | 3.16                    | 2.40                   | 5.09                                 | 0.07      | 0.713                  | 0.19                                | 2.35      | 99.2  |
| Average prism <sup>2</sup> | ---                    | ---               | ---                 | ---               | 65.4                   | 15.3                                 | 2.62      | 1.81      | 3.53                    | 2.45                   | 4.75                                 | 0.08      | 0.64                   | 0.15                                | 2.46      | 99.2  |

## B

| Composite outcrop sample   | Locality               | Terrane  | Textural zone <sup>3</sup> | Grain density (g/cm <sup>3</sup> ) | Rb (ppm) | Sr (ppm) | Zr (ppm) | Ba (ppm) | W* <sup>6</sup> (ppm) |
|----------------------------|------------------------|----------|----------------------------|------------------------------------|----------|----------|----------|----------|-----------------------|
| JANZ- 5                    | N. of Omarama          | Torlesse | I                          | 2.79                               | 88       | 240      | 164      | 442      | 0.58                  |
| JANZ- 8                    | Lindis Pass Rd         | Torlesse | IIA                        | 2.82                               | 109      | 308      | 222      | 585      | N/A <sup>5</sup>      |
| JANZ- 9                    | Lindis Pass Rd         | Torlesse | IIA                        | N/A <sup>5</sup>                   | 105      | 317      | 212      | 667      | N/A <sup>5</sup>      |
| JANZ-10                    | Lindis Pass Rd         | Torlesse | IIIB                       | 2.80                               | 98       | 287      | 203      | 688      | 0.15                  |
| JANZ-12                    | W. of Queenstown       | Caples   | III                        | 2.80                               | 63       | 344      | 145      | 477      | 0.16                  |
| JANZ-13                    | Falls Dam              | Torlesse | I                          | 2.74                               | 109      | 386      | 177      | 629      | 0.49                  |
| JANZ-14                    | Fruitlands-Roxburgh Rd | Caples   | III                        | 2.77                               | 56       | 453      | 150      | 517      | 0.11                  |
| JANZ-15                    | Beaumont               | Caples   | III                        | 2.74                               | 84       | 130      | 197      | 470      | 0.37                  |
| JANZ-18                    | S. of Middlemarch      | Torlesse | IV                         | 2.74                               | 91       | 261      | 201      | 502      | 0.10                  |
| JANZ-20                    | Beaumont-Rongahere Rd  | Caples   | IIA                        | 2.75                               | 126      | 191      | 205      | 608      | 0.28                  |
| JANZ-24                    | Menzies Rd             | Torlesse | IIA                        | 2.76                               | 103      | 238      | 188      | 594      | 0.43                  |
| JANZ-25                    | Myers Pass Rd          | Torlesse | IIA                        | 2.74                               | 98       | 338      | 198      | 662      | 0.64                  |
| JANZ-26                    | Dansey Pass Rd         | Torlesse | III <sup>4</sup>           | 2.81                               | 101      | 232      | 166      | 539      | 0.19                  |
| JANZ-27                    | Macraes Flat           | Torlesse | III-IV                     | 2.78                               | 81       | 200      | 160      | 558      | 0.43                  |
| JANZ-28                    | Benmore Dam Rd         | Torlesse | I                          | 2.73                               | 99       | 285      | 155      | 476      | 0.64                  |
| JANZ-32                    | Cromwell Gorge         | Torlesse | IV                         | 2.74                               | 90       | 406      | 188      | 627      | 0.16                  |
| JANZ-33                    | Harwea neck            | Torlesse | III                        | 2.74                               | 91       | 300      | 169      | 662      | 0.14                  |
| JANZ-35                    | W. of Wanaka           | Torlesse | IV                         | 2.77                               | 97       | 179      | 184      | 551      | 0.07                  |
| JANZ-36                    | East side Lake Wanaka  | Torlesse | IV                         | 2.72                               | 58       | 352      | 164      | 484      | 0.14                  |
| JANZ-70                    | W. of Lake Ohau        | Torlesse | I                          | 2.78                               | 108      | 496      | 185      | 708      | 0.59                  |
| JANZ-71                    | Twizel-Omarama Rd      | Torlesse | I                          | 2.81                               | 92       | 365      | 178      | 523      | 0.47                  |
| Average prism <sup>2</sup> | ---                    | ---      | ---                        | ---                                | 92       | 300      | 181      | 569      | ---                   |

<sup>1</sup> The samples collected at Macraes Flat were randomly selected from dump piles of unmineralized material in the mine pits.

<sup>2</sup> Logratio averaging methods (Ague, J.J., and van Haren, J.L.M., 1996, Assessing metasomatic mass and volume changes using the bootstrap, with application to deep crustal hydrothermal alteration of marble: Economic Geology, v. 91, p. 1169-1182.) yield nearly identical results.

<sup>3</sup> Textural zone designations from Mortimer, N., 1993, Geology of the Otago Schist and adjacent rocks. Scale 1:500,000. Institute of Geological and Nuclear Sciences Geological Map 7. Lower Hutt, New Zealand. Institute of Geological and Nuclear Sciences Ltd. and Turnbull, I.M., Mortimer, N., and Craw, D., 2001, Textural zones in the Haast Schist--a reappraisal: New Zealand Journal of Geology and Geophysics, v. 44, p. 171-183.

<sup>4</sup> Sample JANZ-26 has been re-classified as TZ.III based on the mica grain size criteria of Turnbull et al. (2001).

<sup>5</sup> Grain density and W data were not available for these samples.

<sup>6</sup> Reported W\* concentrations are 80-90°C aqua regia leach fractions.

## Data Repository Item -- Figure DR1

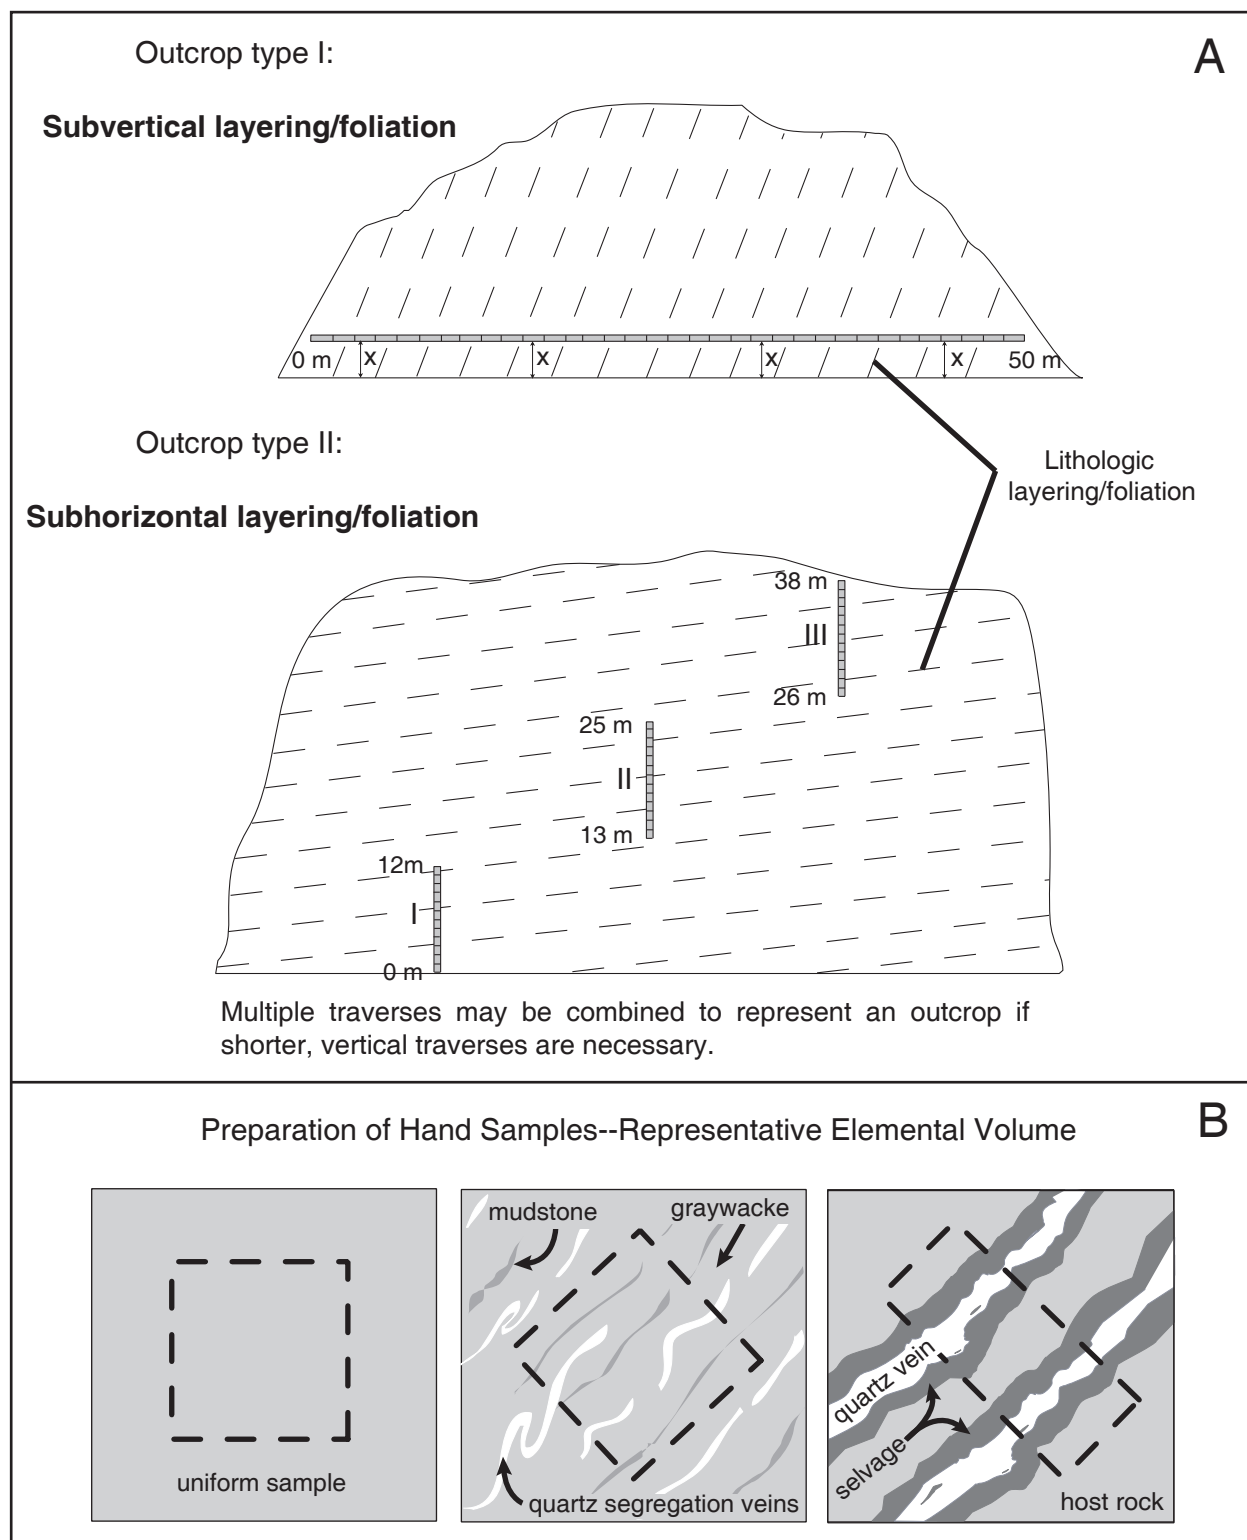

Figure DR1. Diagrams of traverse sampling technique and sample preparation procedure. A: Measuring tapes were oriented along outcrops at high angles to lithologic layering/foliation. Samples were collected at set intervals along the tapes. For outcrops with near vertical foliation or layering, multiple vertical traverses were combined to represent the outcrop, with special care taken to avoid resampling of the same layers. Average outcrop length was ~50 m and consisted of 26 samples. Outcrop vein and metapelite abundances were calculated from vein and lithology measurements along the same tapes. B: Diagrams of hand samples from outcrop traverses. Dashed boxes indicate cut slabs of representative elemental volume. Representative elemental volume, as applied in our study, is the minimum sample volume that retains the average chemical composition of the whole sample.

## Data Repository Item -- Figure DR2

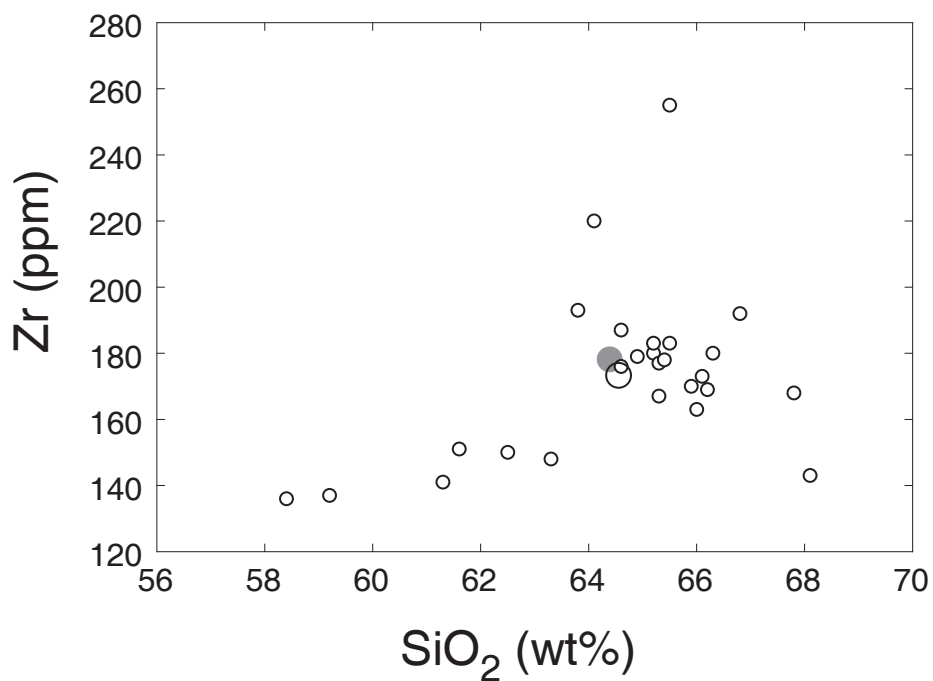

- = single sample analyses of all samples from low-grade TZ outcrop JANZ-71 (includes graywacke and mudstone)
- = arithmetic average of all single samples from outcrop JANZ-71
- = outcrop composite analysis of outcrop JANZ-71

Figure DR2. SiO<sub>2</sub> vs Zr plot for all single samples from low-grade TZ outcrop JANZ-71. Arithmetic average of single sample compositions is nearly identical to the composited analysis, confirming that the new traverse-based, outcrop sampling technique is effective in averaging out the hand sample variability that has plagued many previous mass balance investigations.
